# Supplementary material
Source: PubMed Central journal article supplement (PMC5785245)
Supplement: jci-128-96061-s001.pdf [file jci-128-96061-s001.pdf]

## Supplemental data

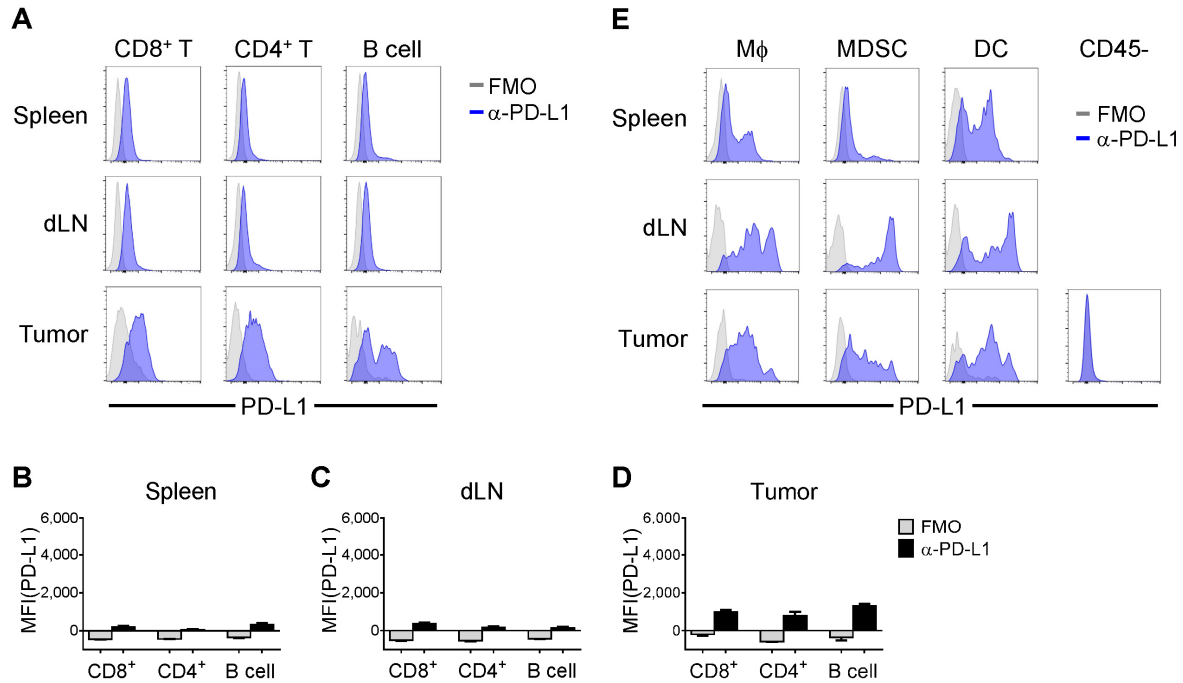

**Supplementary Figure 1. PD-L1 is less abundant in lymphocytes.** C57BL/6 mice were inoculated with  $1 \times 10^6$  MC38 cells. Spleen, dLN, and tumor tissues were collected on day 22. PD-L1 expression in lymphocytes was measured by flow cytometry. **(A)** Representative flow cytometry histograms are shown. **(B-D)** MFIs of PD-L1 staining in spleen **(B)**, dLN **(C)**, and tumor **(D)** are shown ( $n = 3$ ). **(E)** C57BL/6 mice were inoculated with MC38.PD-L1<sup>-/-</sup> cells. Spleen, dLN, and tumor tissues were collected on day 22. PD-L1 expression was measured by flow cytometry. Data indicate mean  $\pm$  SEM and are representative of two independent experiments. Statistical analysis was performed using an unpaired Student's two-tailed t test.

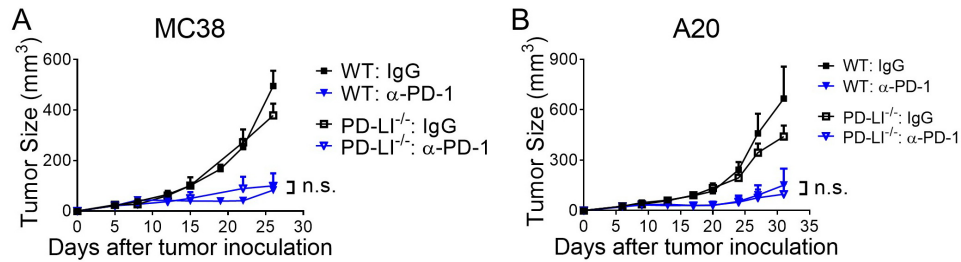

**Supplementary Figure 2. Tumor expressed-PD-L1 is dispensable for the responses to anti-PD-1.** (A) C57BL/6 mice ( $n = 5$ ) were inoculated with  $1 \times 10^6$  MC38.WT or MC38.PD-L1<sup>-/-</sup> cells. After tumors established, mice were treated with 200  $\mu$ g anti-PD-1 on days 5, 8, and 10. Tumor growth was measured twice a week. (B) Balb/c mice ( $n = 5$ ) were inoculated with  $3 \times 10^6$  A20.WT or A20.PD-L1<sup>-/-</sup> cells. Mice were treated with 200  $\mu$ g anti-PD-1 on days 6, 9, and 13. n.s., not significant. Data indicate mean  $\pm$  SEM and are representative of two independent experiments. Statistical analysis was performed using an unpaired Student's two-tailed t test.

A

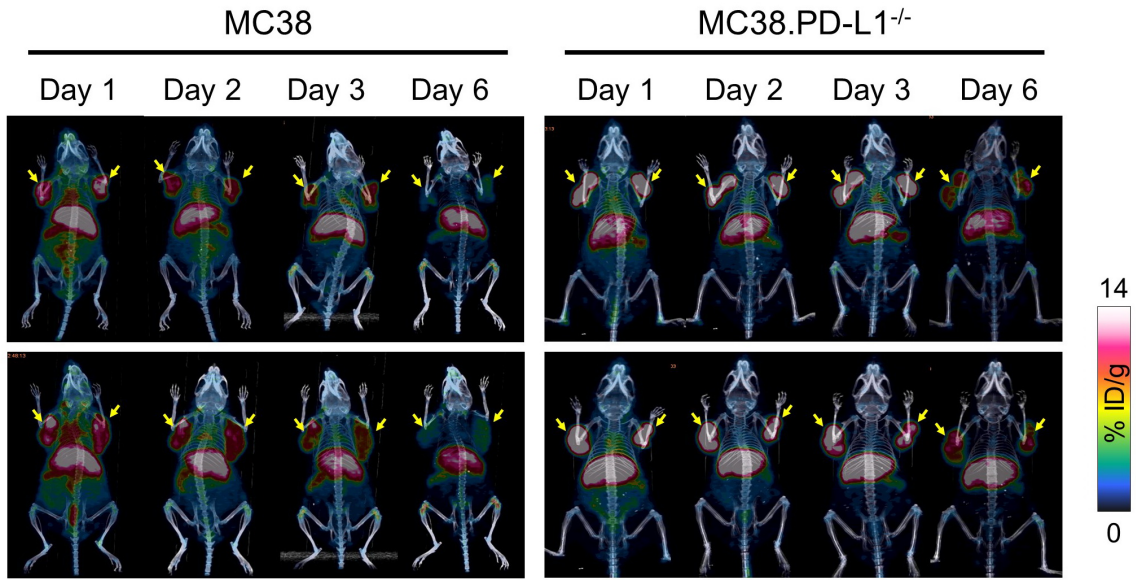

B

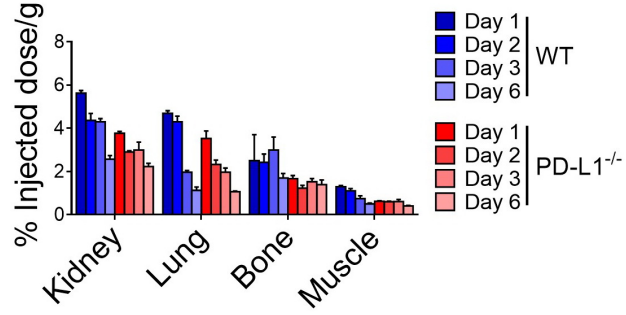

C

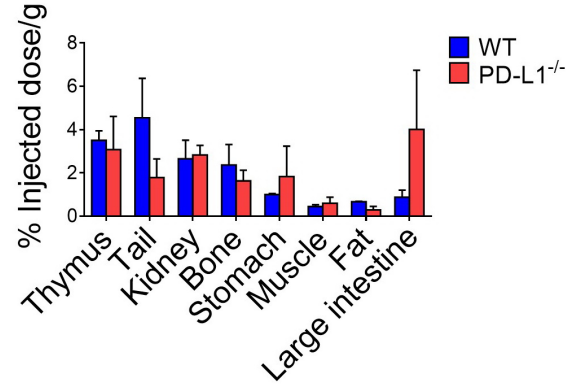

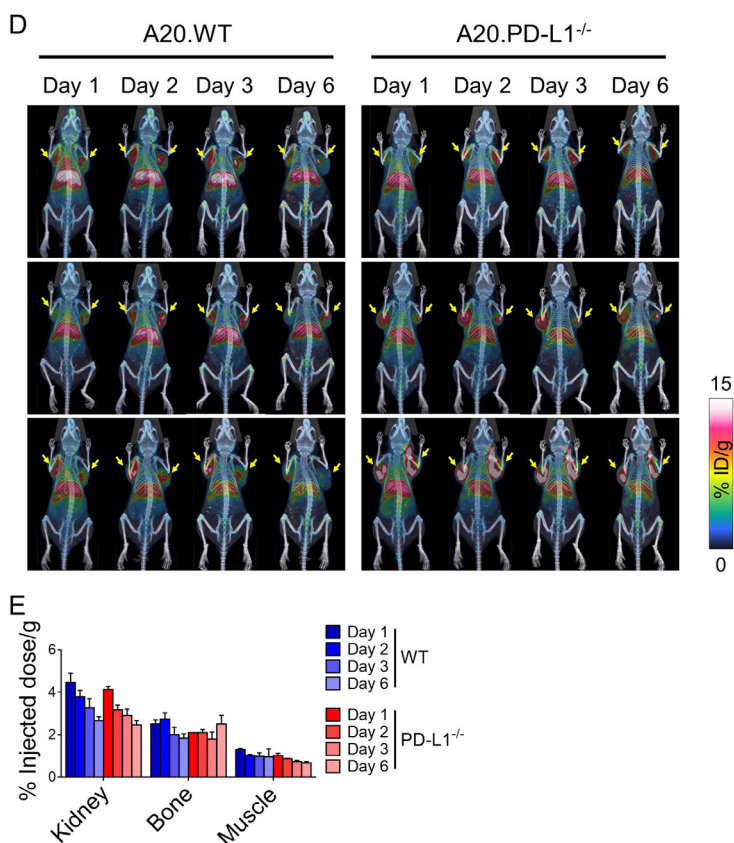

**Supplementary Figure 3. Imaging data show the distribution of anti-PD-L1 antibody in tumor-bearing mice.** (A-C) Mice were treated as in Figure 2A. (A) Antibody distribution was measured by PET/CT (n = 3). Two representative mice were shown. (B) Quantitation of the uptake of <sup>89</sup>Zr-anti-PD-L1 antibody on days 1, 2, 3, and 6 post injection. (C) *Ex vivo* biodistribution of <sup>89</sup>Zr-anti-PD-L1 antibody uptake on day 6 post injection is shown. (D) A20.WT or A20.PD-L1<sup>-/-</sup> tumor-bearing mice were injected with 50  $\mu$ Ci of <sup>89</sup>Zr radiolabeled deferoxamine conjugated anti-PD-L1 (<sup>89</sup>Zr-anti-PD-L1) antibody (n = 3 per group). Antibody distribution was imaged by PET/CT on 1, 2, 3, and 6 days post injection. (E) The uptake of <sup>89</sup>Zr-anti-PD-L1 antibody in A20 tumors was measured by PET/CT and quantitated in various organs on days 1, 2, 3, and 6 post injection. Yellow arrows indicate tumors. Statistical analysis was performed using an unpaired Student's two-tailed t test.



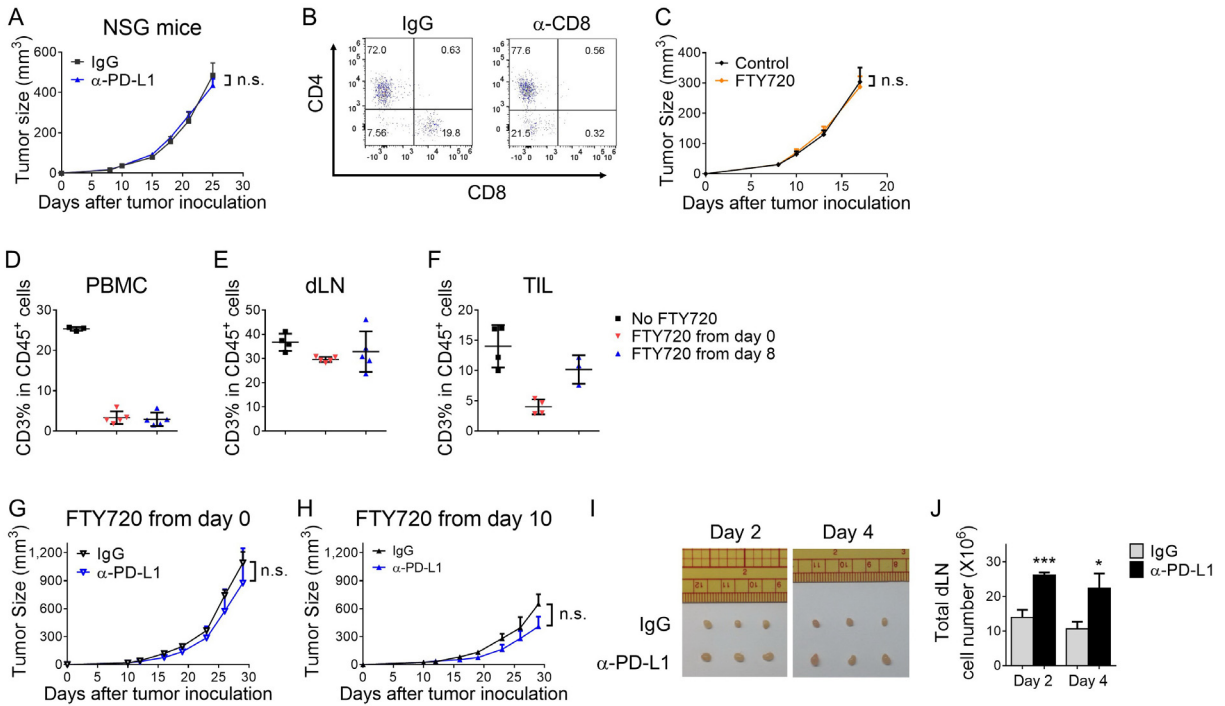

**Supplementary Figure 4. FTY720 treatment abrogates antitumor effects of checkpoint blockade.** (A) NSG mice (n = 5) were inoculated with  $1 \times 10^6$  MC38 cells. After tumors established, mice were treated with 200  $\mu$ g anti-PD-L1 on days 11 and 14. Tumor growth was measured twice a week. (B) MC38 tumor-bearing mice were treated with 200  $\mu$ g control IgG or anti-CD8 antibody. Two days later, tumor tissues were collected and tumor-infiltrating CD3<sup>+</sup> T cells were analyzed by flow cytometry. (C) NSG mice (n = 5) were inoculated with  $1 \times 10^6$  MC38 cells. FTY720 were injected from day 0. Tumor growth curve is shown. (D-F) MC38 tumor-bearing mice were treated with FTY720 from day 0 or day 8. Tissues were collected on day 11. Percentages of CD3<sup>+</sup> T cells among CD45<sup>+</sup> cells in PBMC (D), draining lymph node (E), and tumor tissues (F) were measured by flow cytometry. (G-H) A20 tumor-bearing mice (n = 5) were treated with 200  $\mu$ g IgG or anti-PD-L1 on days 10 and 13. Mice were also treated with FTY720 from day 0 (G) or day 10 (H) after tumor inoculation. (I) MC38 tumor-bearing mice were treated with 200  $\mu$ g IgG or anti-PD-L1 on day 8. Draining LNs were collected 2 or 4 days after treatment (n = 3). (J) Total cell numbers in

dLN were shown. Data indicate mean  $\pm$  SEM and are representative of at least two independent experiments. Statistical analysis was performed using an unpaired Student's two-tailed t test.

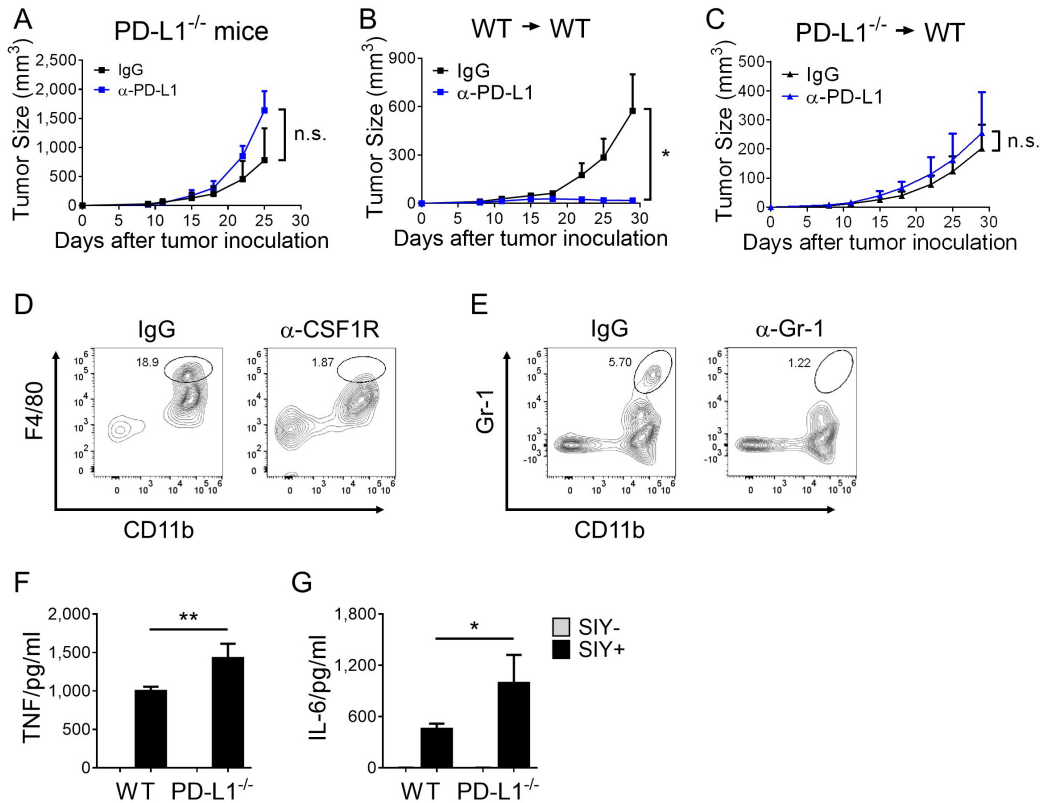

**Supplementary Figure 5. Antitumor effects of anti-PD-L1 depend on PD-L1 from hematopoietic cells.** (A) PD-L1<sup>-/-</sup> mice were inoculated with  $1 \times 10^6$  E.G7 cells. Mice were treated with 200  $\mu$ g IgG or anti-PD-L1 on days 9 and 12 ( $n = 4$ ). Tumor growth was measured twice a week. (B-C) C57BL/6 mice were reconstituted with bone marrow cells from WT (B) or PD-L1<sup>-/-</sup> (C) mice. Ten weeks after reconstitution, mice were inoculated with  $1 \times 10^6$  E.G7 cells and treated with 200  $\mu$ g anti-PD-L1 on days 12 and 15 ( $n = 5$ ). (D-E) Mice were treated with depletion antibodies. Depletion of macrophages (D) or MDSCs (E) in tumor tissues were evaluated by flow cytometry. (F-G) BMDMs from WT or PD-L1<sup>-/-</sup> mice were loaded with SIY peptide, then co-cultured with 2C T cells for 3 days. TNF (F) and IL-6 (G) levels in culture supernatants were measured by CBA. Statistical analysis was performed using an unpaired Student's two-tailed t test. \*,  $p < 0.05$ . \*\*,  $p < 0.01$ .

**Supplementary Table 1. List of antibodies used.**

| <b>Antibody</b>         | <b>Supplier</b> | <b>Catalog number</b> | <b>Dilution</b> | <b>Application</b> |
|-------------------------|-----------------|-----------------------|-----------------|--------------------|
| 7-AAD                   | BioLegend       | 420404                | 1:100           | Flow cytometry     |
| APC anti-mouse CD11c    | BioLegend       | 117310                | 1:500           | Flow cytometry     |
| APC anti-mouse PD-L1    | BioLegend       | 124312                | 1:200           | Flow cytometry     |
| APC/Cy7 anti-mouse CD8a | BioLegend       | 100714                | 1:500           | Flow cytometry     |
| APC/Cy7 anti-mouse Gr-1 | BioLegend       | 108424                | 1:200           | Flow cytometry     |
| BV421 anti-mouse CD45   | BioLegend       | 103133                | 1:500           | Flow cytometry     |
| FITC anti-mouse B220    | BioLegend       | 103206                | 1:200           | Flow cytometry     |
| FITC anti-mouse CD69    | BioLegend       | 104506                | 1:200           | Flow cytometry     |
| FITC anti-mouse F4/80   | BioLegend       | 123108                | 1:200           | Flow cytometry     |
| PE anti-mouse CD11c     | BioLegend       | 117308                | 1:500           | Flow cytometry     |
| PE anti-mouse CD3e      | BioLegend       | 100308                | 1:500           | Flow cytometry     |
| PE/Cy7 anti-mouse CD4   | BioLegend       | 100422                | 1:1000          | Flow cytometry     |
| APC anti-mouse CD3e     | eBioscience     | 17-0031-82            | 1:500           | Flow cytometry     |
| APC anti-mouse CD8a     | eBioscience     | 17-0081-82            | 1:500           | Flow cytometry     |
| PE anti-mouse PD-L1     | eBioscience     | 12-5982-83            | 1:200           | Flow cytometry     |
| PE/Cy7 anti-mouse CD11b | eBioscience     | 25-0112-82            | 1:1000          | Flow cytometry     |
